# Supplementary material for: An animal-free preclinical drug screening platform based on human precision-cut kidney slices
Source: PubMed Central journal article supplement (PMC10029185; doi:10.1186/s13104-023-06303-4), 2023-03-20

**An animal-free preclinical drug screening platform based on human precision-cut kidney slices**

Henricus A.M. Mutsaers<sup>1,#,\*</sup>, Michael Schou Jensen<sup>1,#</sup>, Jean-Claude Kresse<sup>1</sup>, Stine Julie Tingskov<sup>1</sup>, Mia Gebauer Madsen<sup>2</sup> and Rikke Nørregaard<sup>1</sup>

<sup>1</sup>Department of Clinical Medicine, Aarhus University, Aarhus, Denmark

<sup>2</sup>Department of Urology, Aarhus University Hospital, Aarhus, Denmark

**Figure 2C Butaprost – FN and  $\alpha$ SMA**

FN

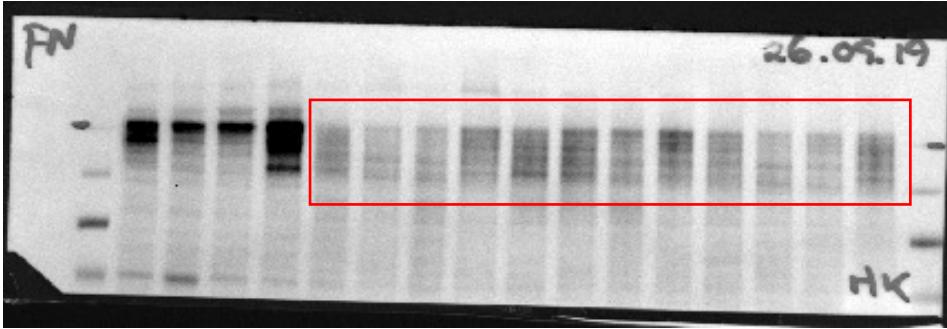

$\alpha$ SMA

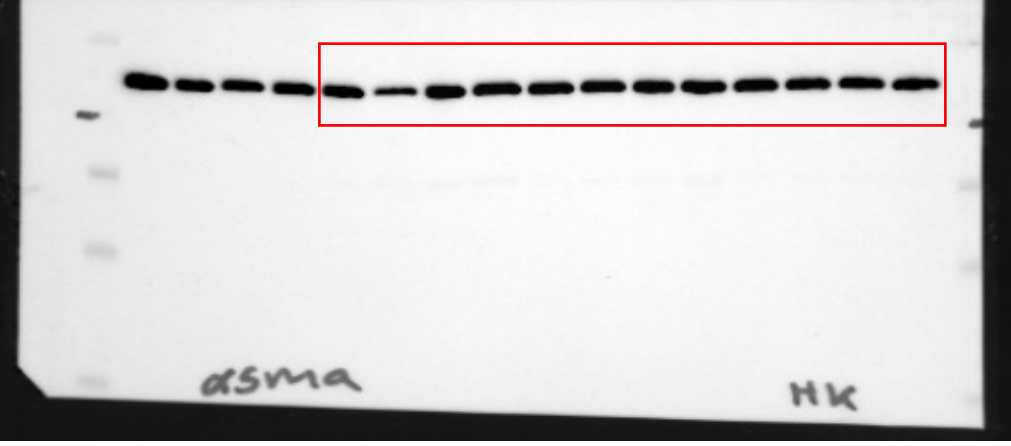

**Figure 2D SC-19220 – FN and  $\alpha$ SMA**

FN

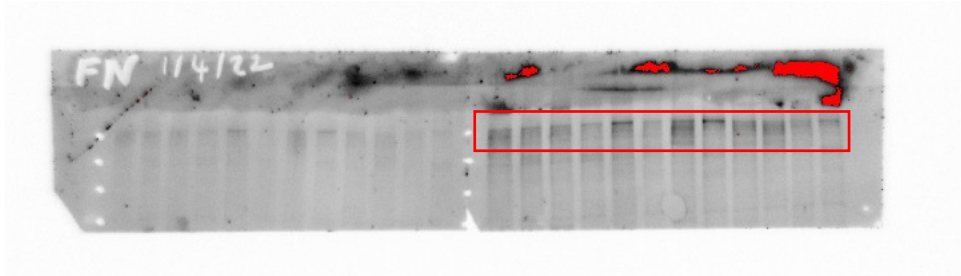

$\alpha$ SMA

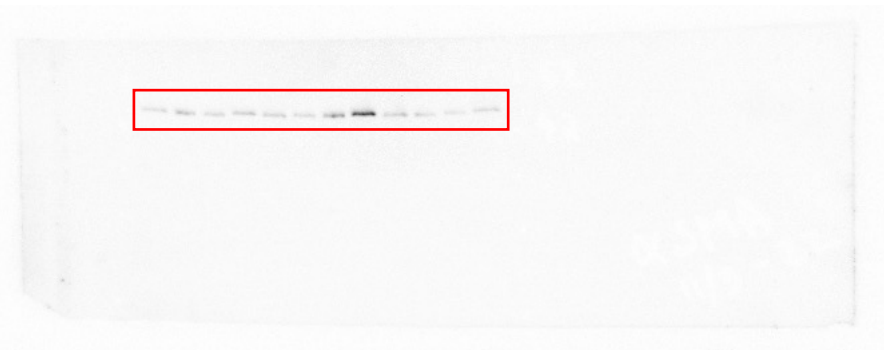

**Figure 2E Tamoxifen – FN and  $\alpha$ SMA**

FN

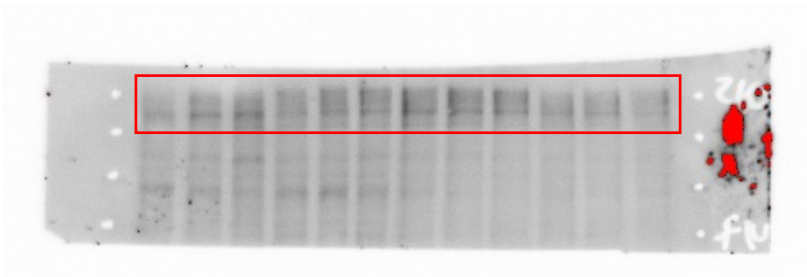

$\alpha$ SMA

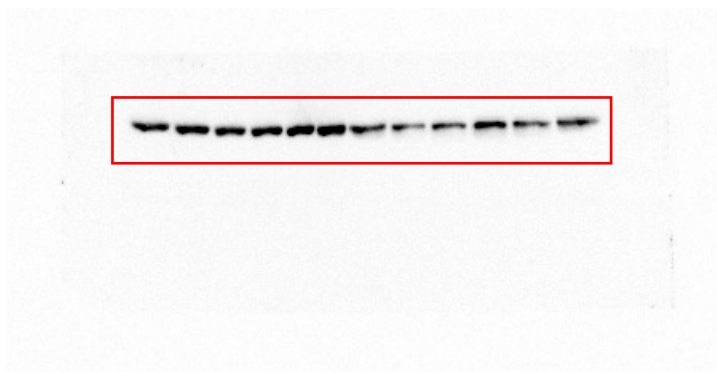

Supplement: 13104_2023_6303_MOESM1_ESM.pdf [file 13104_2023_6303_MOESM1_ESM.pdf]
